# Supplementary material for: A new specimen of Manchurochelys manchoukuoensis from the Early Cretaceous Jehol Biota of Chifeng, Inner Mongolia, China and the phylogeny of Cretaceous basal eucryptodiran turtles
Source: PubMed Central journal article supplement (PMC4021230; doi:10.1186/1471-2148-14-77), 2014-04-05

### **ADDITIONAL FILE 3**

**Consensus trees for the phylogenetic analyses of Zhou, Rabi and Joyce:** “A new specimen of *Manchurochelys manchoukuoensis* from the Early Cretaceous Jehol Biota of Chifeng, Inner Mongolia, China and the phylogeny of Cretaceous basal eucryptodiran turtles”. *BMC Evolutionary Biology*.



# Strict consensus tree of Analysis B

Strict consensus of 136 trees (0 taxa excluded)

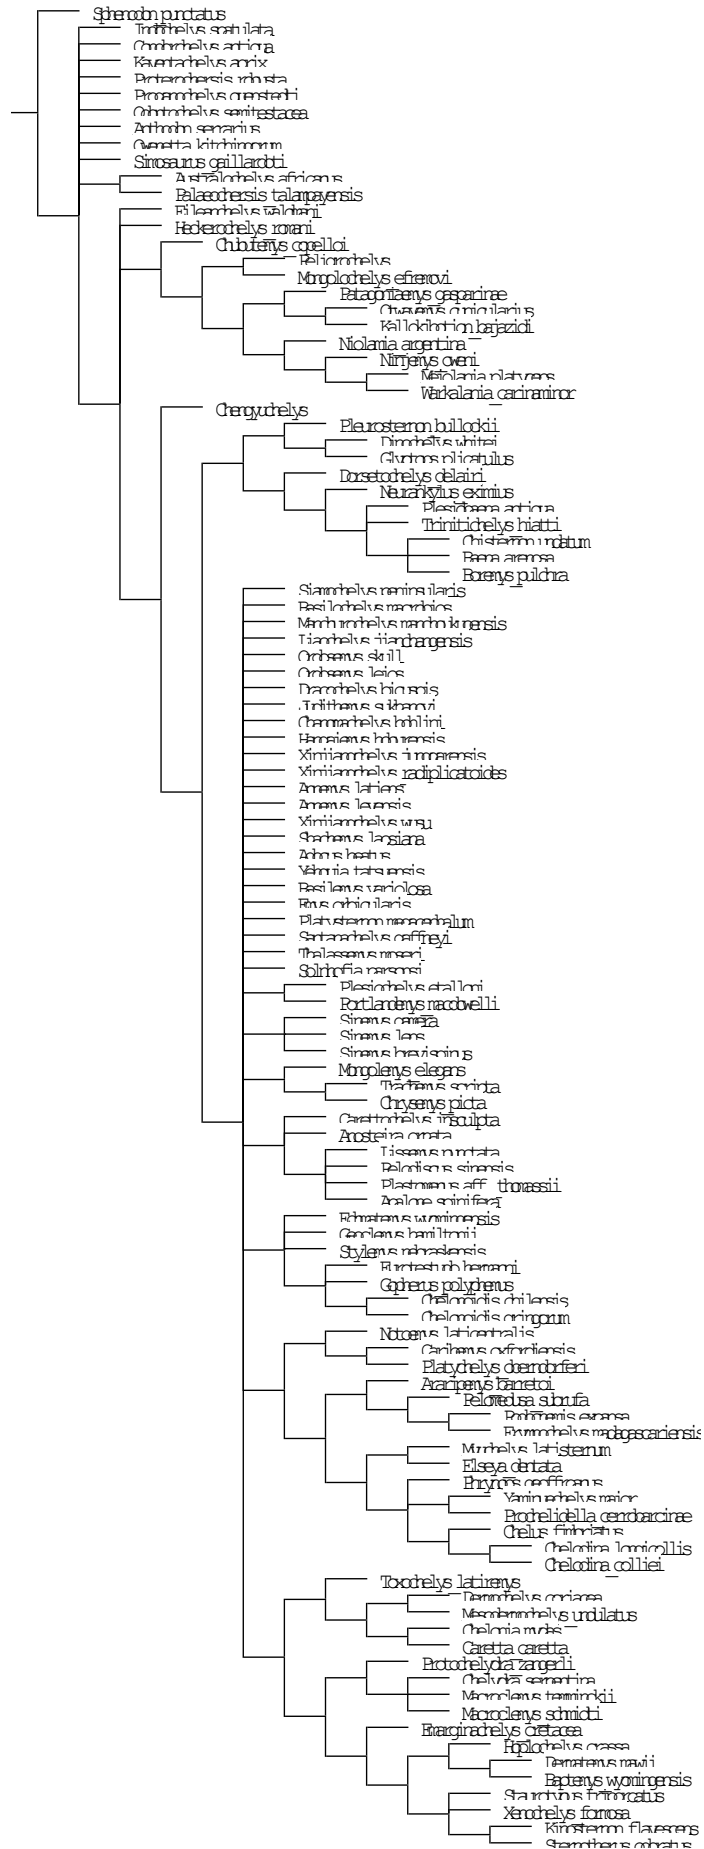

# Pruned strict consensus tree of Analysis B

Strict consensus of 136 trees (6 taxa excluded)

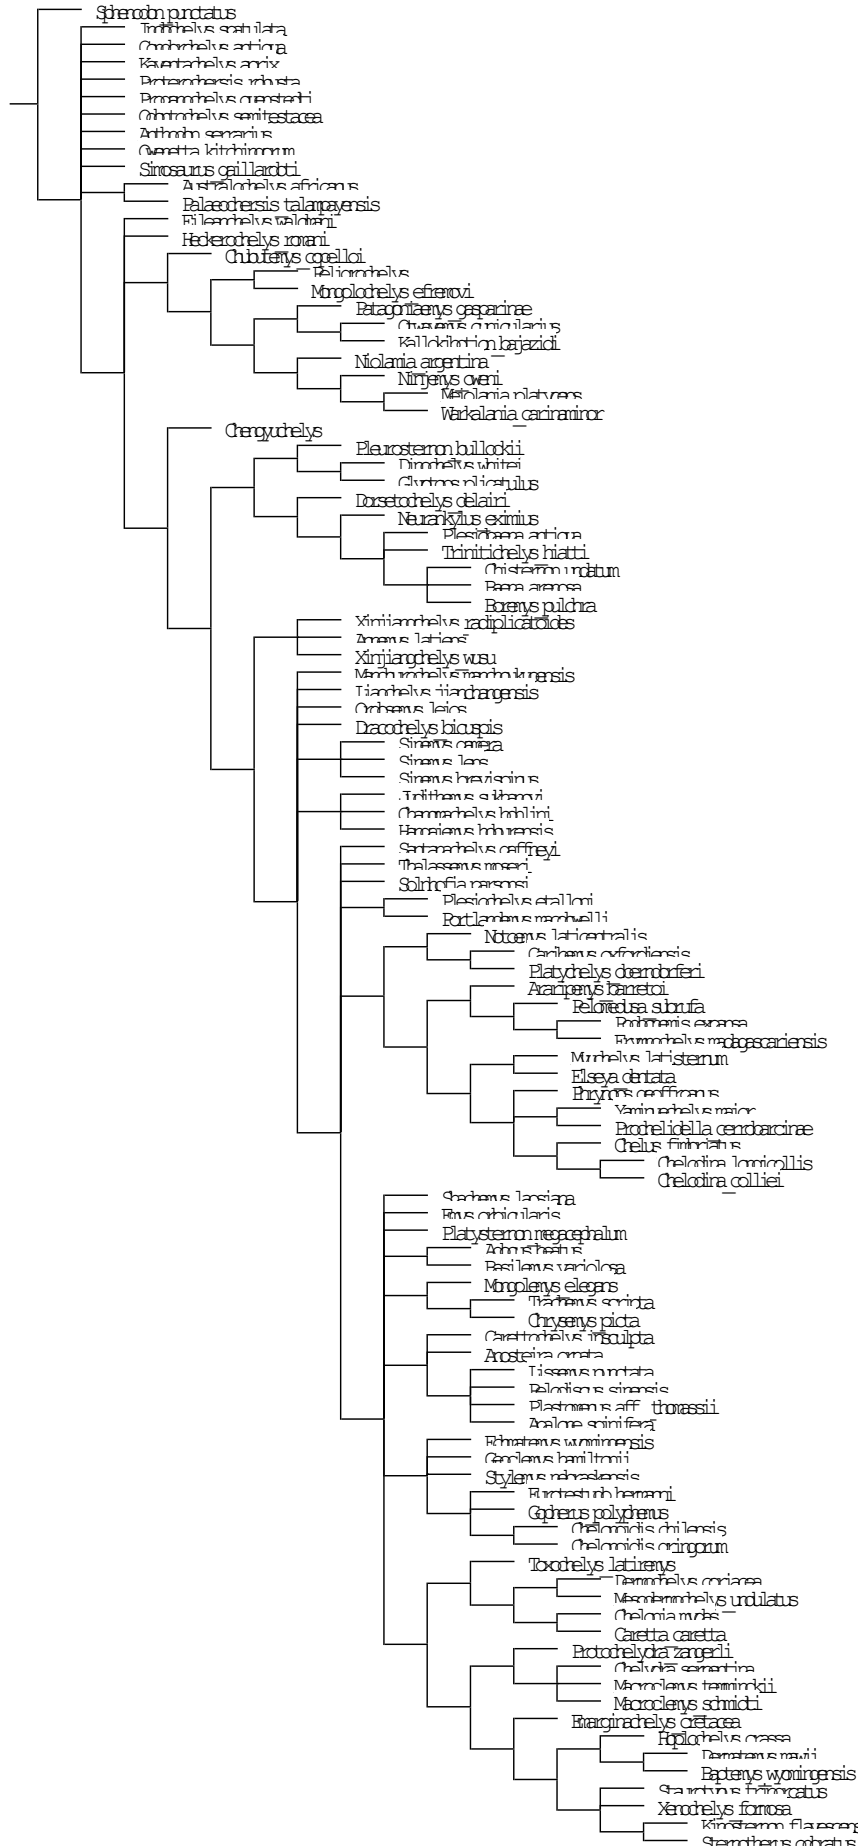





# Strict consensus tree of Analysis D

Strict consensus of 143 trees (14 taxa exclude)

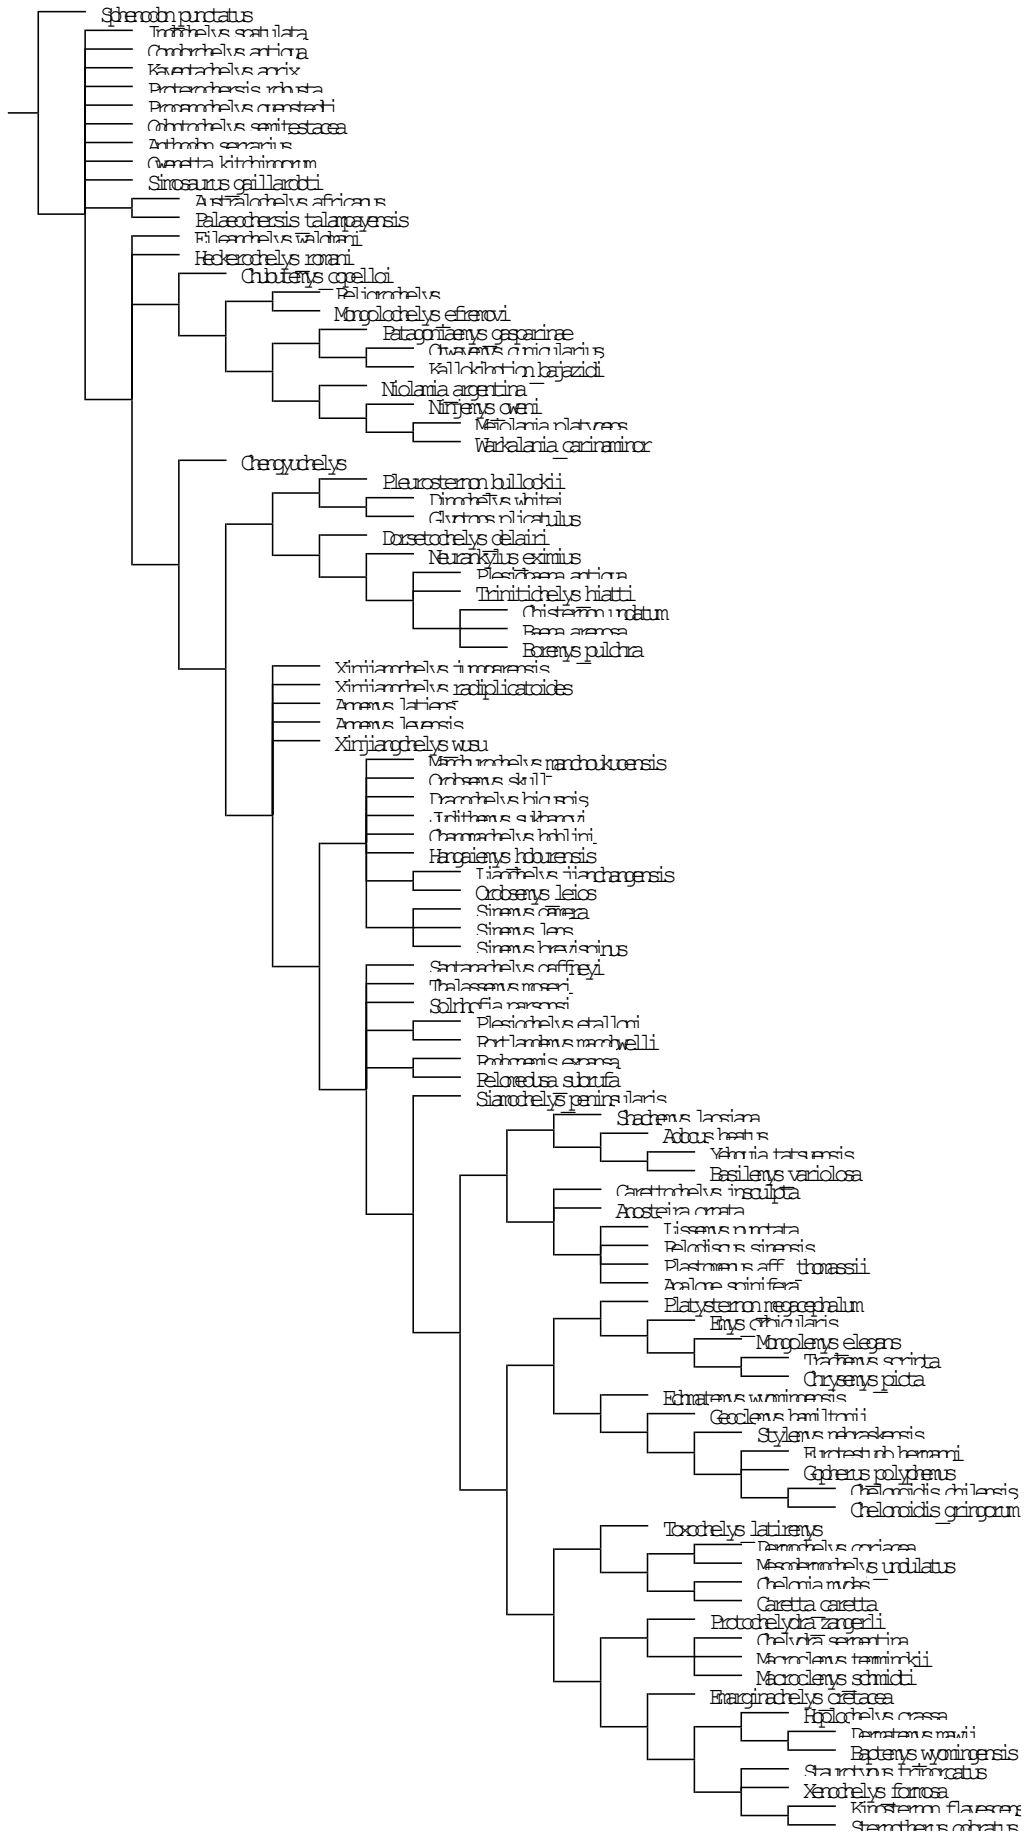







# Bootstrap values for Analysis D

CI values, 100 replicates, cut=1 (tree 1) - Standard Bootstrap

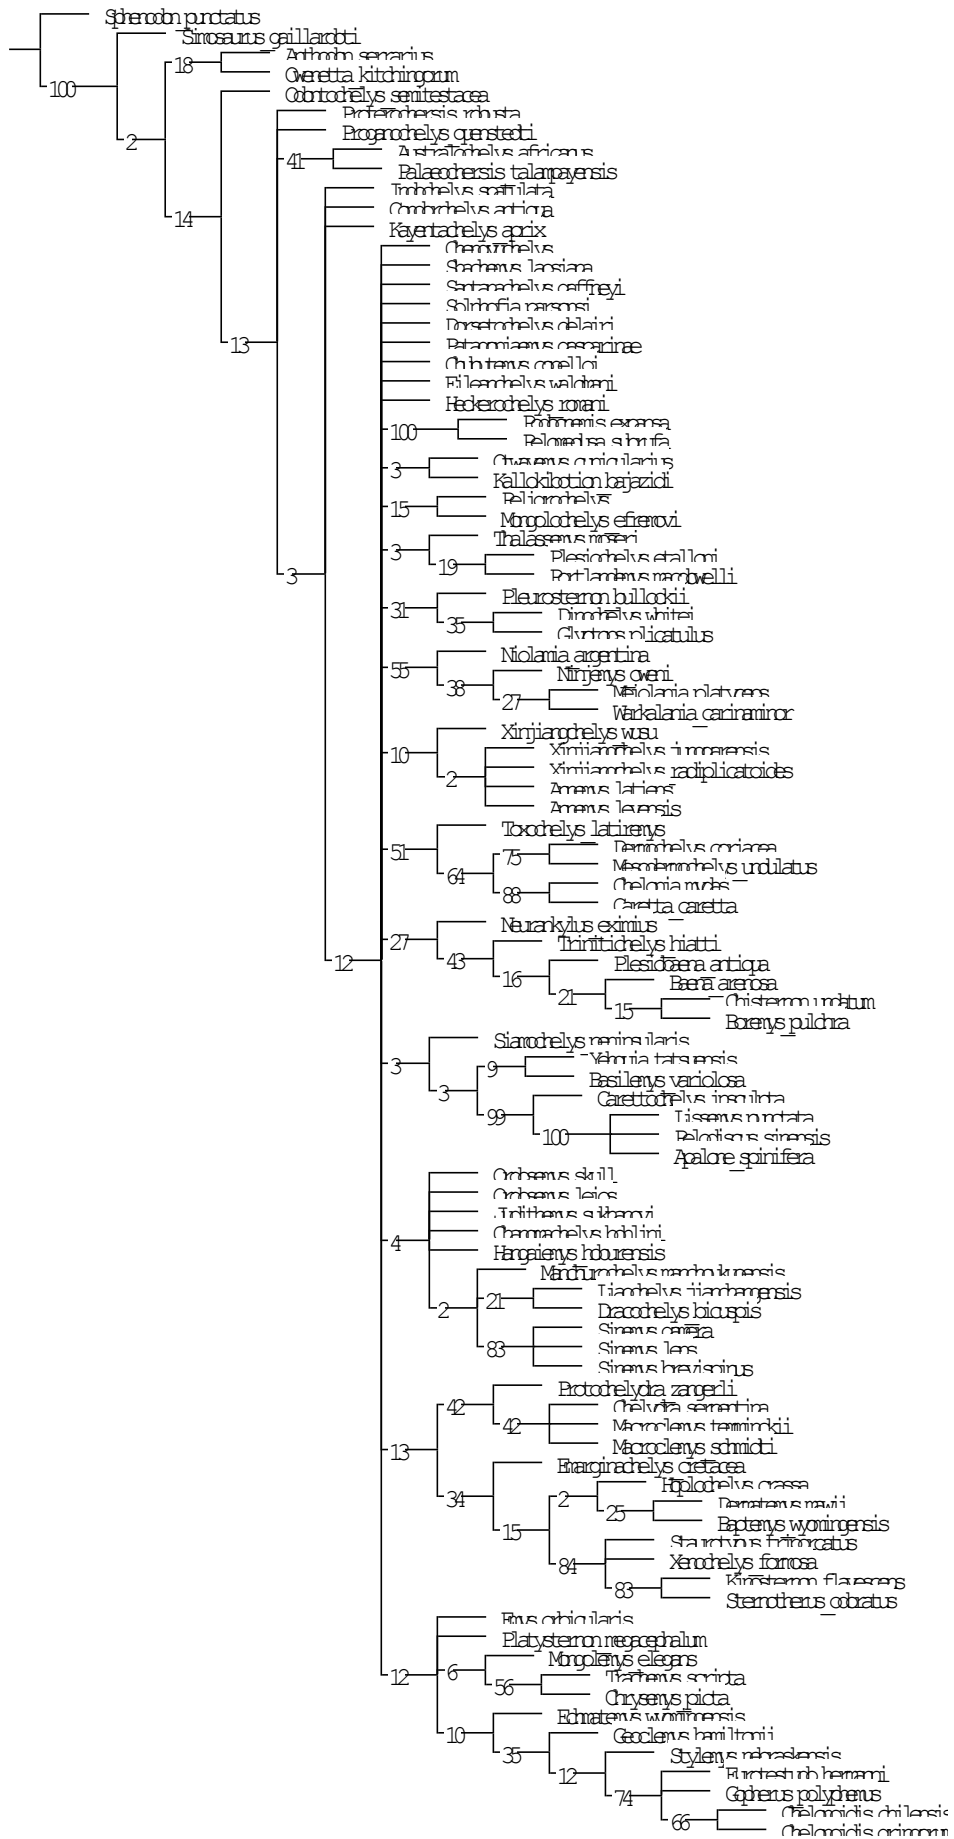

Bootstrap values for Analysis D with new characters excluded

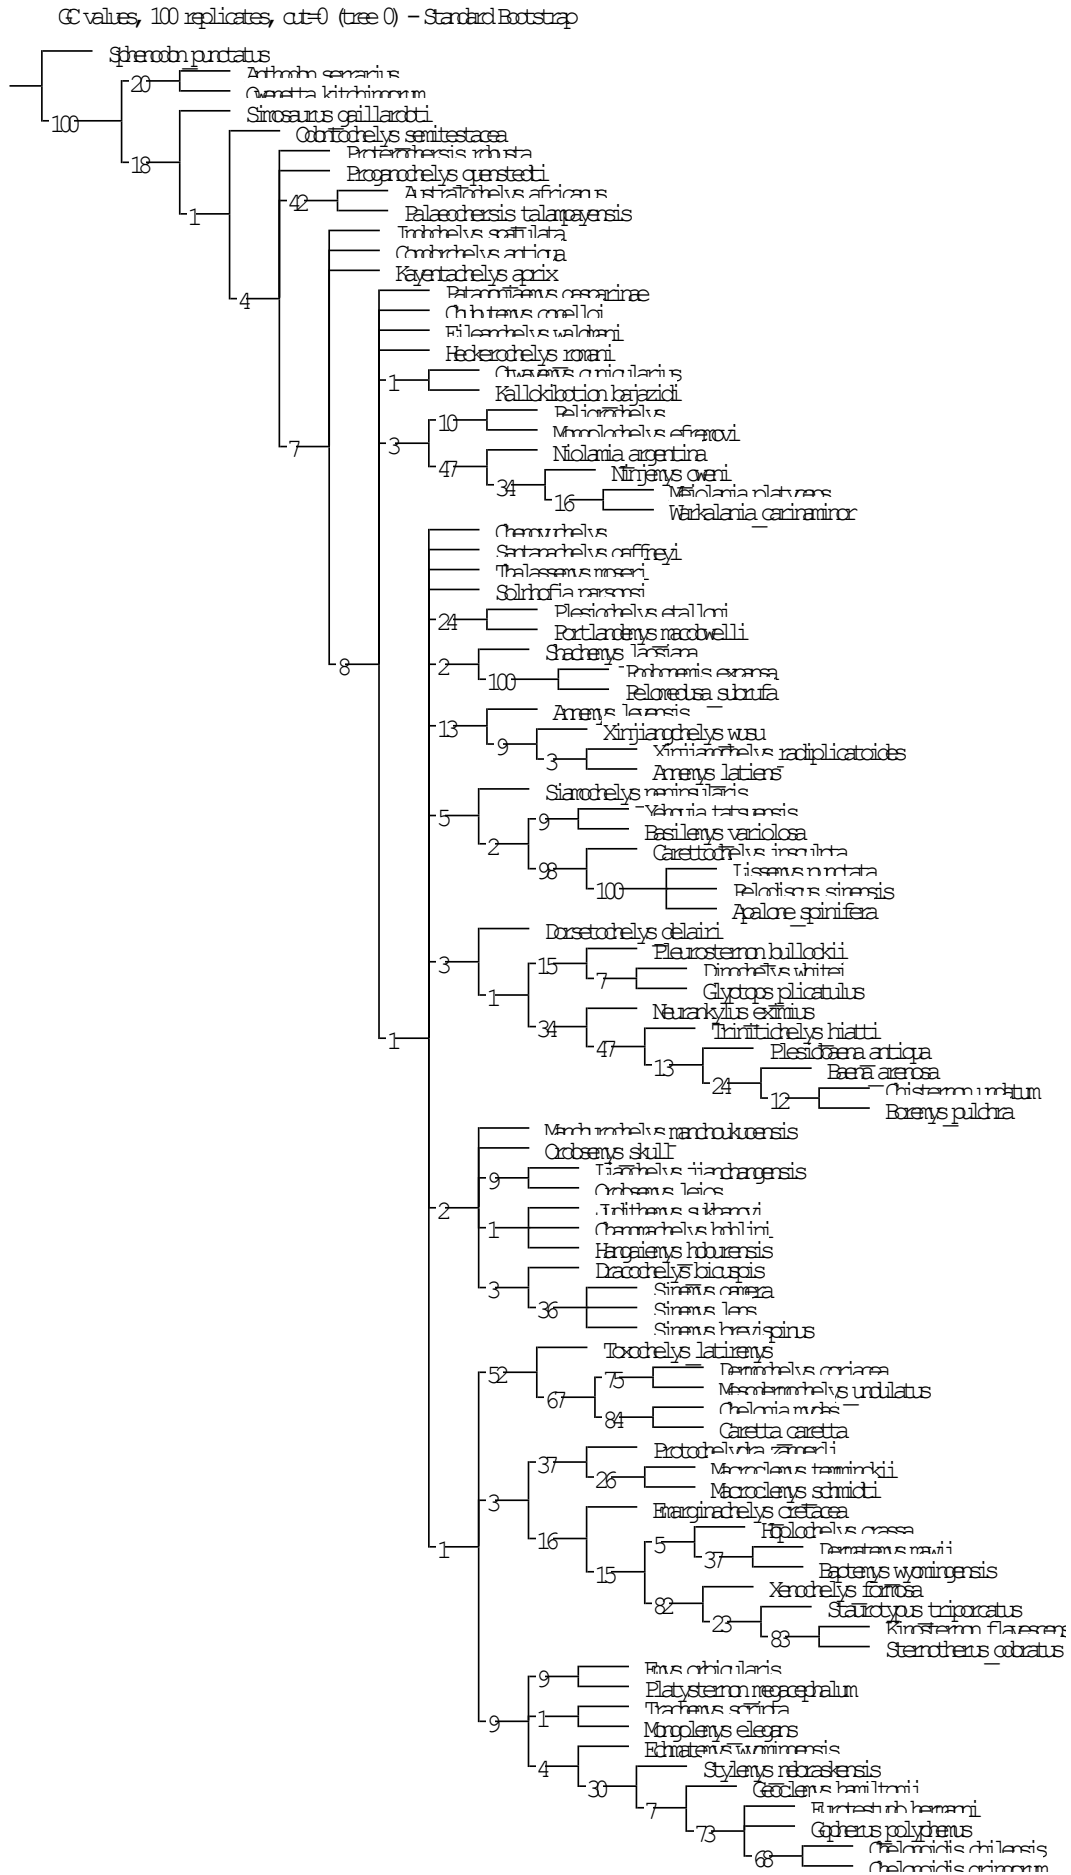

Supplement: 1471-2148-14-77-S3.pdf [file 1471-2148-14-77-S3.pdf]
